# Supplementary material for: DNA-templated ensemble for label-free and real-time fluorescence turn-on detection of enzymatic/oxidative cleavage of single-stranded DNA
Source: Royal Society of Chemistry journal article supplement (doi:10.1039/c1cc12216a), 2011-01-01
Supplement: c1cc12216a.pdf [file c1cc12216a.pdf]

## SUPPORTING INFORMATION

### DNA-templated ensemble for label-free and real-time fluorescence turn-on detection of enzymatic/**oxidative** cleavage of single-stranded DNA

#### EXPERIMENTAL SECTION

##### Materials and methods

Ligand 1 was prepared as previous reported.<sup>1</sup> S1 nuclease was purchased from TaKaRa biotechnology CO., Ltd. Single-stranded oligonucleotides (ssDNA) used in this study were obtained from Shanghai Sangon Biological Engineering Technology & Services Co.,Ltd and purified by PAGE method. All other chemicals were of analytical reagent grade and used without further purification. Ultrapure water was used throughout this work and purified by a Milli-Q water system. Steady-state fluorescence measurements and time curves were carried out by using a JASCO FP-6500 spectrofluorometer. Stopped-flow fluorescence measurements were performed under standard buffer conditions by using a stopped-flow device from Applied Photophysics (Leatherhead, Surrey, KT227PB, UK) in two-syringe mode.

The sequences of the single-stranded DNAs with different base length are as follows:

|              |                                        |              |
|--------------|----------------------------------------|--------------|
| DNA-1        | TGTCTG                                 | 6 mer        |
| DNA-2        | TGTTTTGTCT                             | 10mer        |
| DNA-3        | CCAGATACTCACCGG                        | 15mer        |
| <b>DNA-4</b> | <b>ATCGTATAATGGTTTCGTC</b>             | <b>20mer</b> |
| <b>DNA-5</b> | <b>CTAACGGAATGTTTCATTCGGTTAG</b>       | <b>24mer</b> |
| <b>DNA-6</b> | <b>TTACGGAAACGGAATTATTCGGTATCGGTTA</b> | <b>32mer</b> |

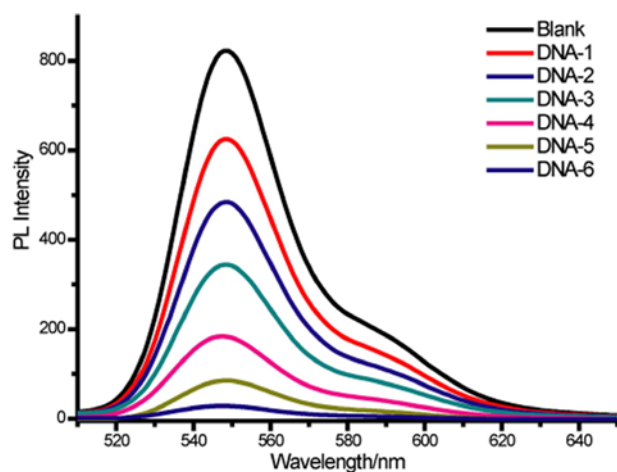

Fig. S1 The PL spectra of ligand 1 in the presence of ssDNAs with different base lengths. [Ligand 1] =  $1 \times 10^{-6}$  M, [ssDNA] =  $1 \times 10^{-7}$  M. The measurements were performed in Tris-HCl buffer (20 mM, pH = 7.0).

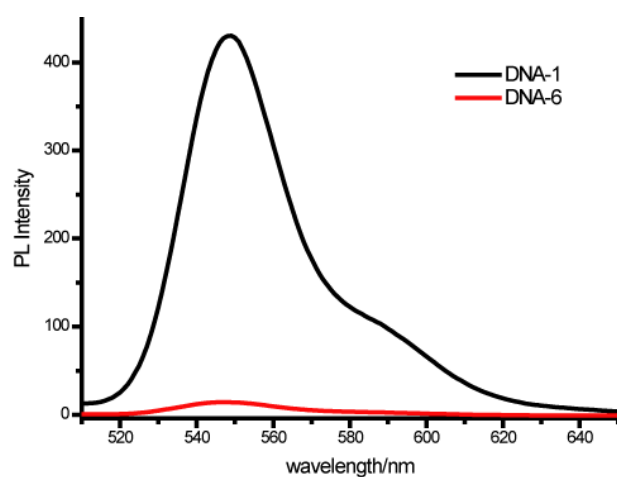

Figure S2 The PL spectra of ligand 1 in the presence of DNA-1 (6-mer) or DNA -6 (32-mer) with the same base concentration. [Ligand 1] =  $1 \times 10^{-6}$  M, [base]<sub>DNA-1</sub> = [base]<sub>DNA-6</sub> =  $3.2 \times 10^{-6}$  M. The measurements were performed in Tris-HCl buffer (20 mM, pH=7.0).

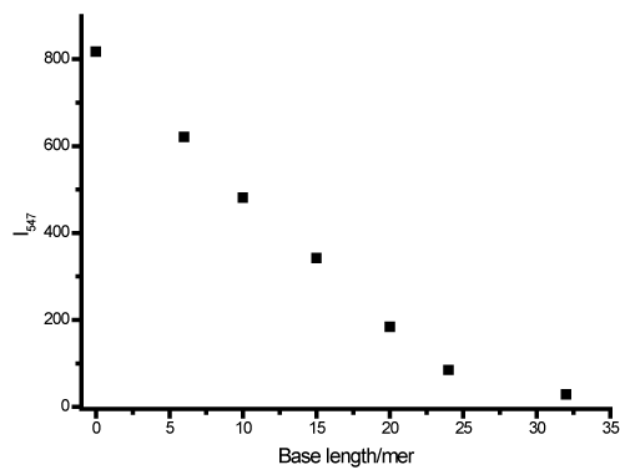

Figure S3 PL  $I_{547}$  of ligand 1 in the presence of ssDNAs with different base lengths. [Ligand 1] =  $1 \times 10^{-6}$  M, [ssDNA] =  $1 \times 10^{-7}$  M. The measurements were performed in Tris-HCl buffer (20 mM, pH=7.0).

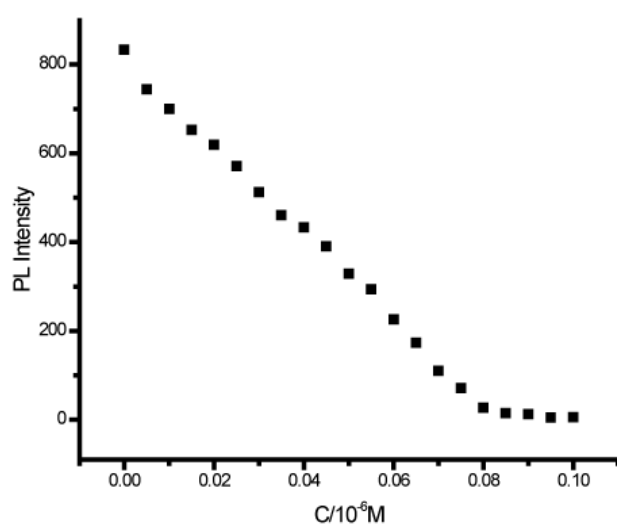

Figure S4 Fluorescence titration of ligand 1 with DNA-6 in tris-HCl (20mM, pH=7.0) at 25 °C. [ligand 1] =  $1 \times 10^{-6}$  M

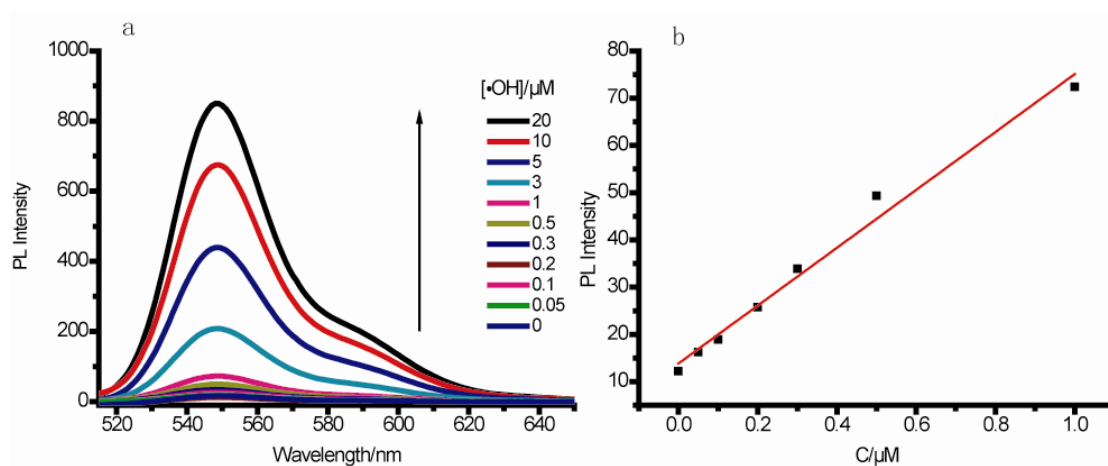

Figure S5 The fluorescence changes upon adding different amounts of hydroxyl radical in Tris-HCl buffer (20mM, pH=7.0) at room temperature (25 °C). [ligand 1] =  $1 \times 10^{-6}$  M, [ssDNA] =  $1 \times 10^{-7}$  M,  $[\text{Fe}^{2+}]:[\text{H}_2\text{O}_2] = 1:6$ .

[1] B. Wang and C. Yu, *Angew. Chem. Int. Ed.*, 2010, **49**, 1485-1488.
